# Supplementary material for: Modular Synthetic Biology Toolkit for Filamentous Fungi
Source: PubMed Central journal article supplement — ACS Synth Biol. 2021 Nov 2;10(11):2850–61. doi: 10.1021/acssynbio.1c00260 (PMC8609570; doi:10.1021/acssynbio.1c00260), 2021-11-02
Supplement: sb1c00260_si_001.pdf [file sb1c00260_si_001.pdf]

# Modular Synthetic Biology Toolkit for Filamentous Fungi

László Mózsik<sup>†</sup>, Carsten Pohl<sup>†</sup>, Vera Meyer, Roel A.L. Bovenberg, Yvonne Nygård and Arnold J.M. Driessen<sup>\*</sup>

## Author information

Authors:

László Mózsik<sup>†</sup> - *Molecular Microbiology, Groningen Biomolecular Sciences and Biotechnology Institute, University of Groningen, 9747 AG, Groningen, The Netherlands*, ORCID: <http://orcid.org/0000-0001-5211-3873>

Carsten Pohl<sup>†</sup> - *Chair of Applied and Molecular Microbiology, Institute of Biotechnology, Technische Universität Berlin, 10623 Berlin, German*, ORCID: <https://orcid.org/0000-0002-3402-9595>

Vera Meyer - *Chair of Applied and Molecular Microbiology, Institute of Biotechnology, Technische Universität Berlin, 10623 Berlin, Germany*, ORCID: <https://orcid.org/0000-0002-2298-2258>

Roel A. L. Bovenberg - *DSM Biotechnology Center, 2613 AX, Delft, The Netherlands; Synthetic Biology and Cell Engineering, Groningen Biomolecular Sciences and Biotechnology Institute, University of Groningen, 9747 AG, Groningen, The Netherlands*

Yvonne Nygård - *Chalmers University of Technology, Department of Biology and Biological Engineering, Division of Industrial Biotechnology, 412 96, Gothenburg, Sweden*, ORCID: <https://orcid.org/0000-0001-6117-0343>

## Supporting Information

| Fungal strain                                  | Genotype                                         | Transformed donor DNA                  |
|------------------------------------------------|--------------------------------------------------|----------------------------------------|
| <i>P. rubens</i> DS68530                       | $\Delta$ hdfA ( $\Delta$ Ku70), $\Delta$ pen-BGC | n/a                                    |
| DS68530_pLM-AMA002                             | $\Delta$ hdfA ( $\Delta$ Ku70), $\Delta$ pen-BGC | pLM-AMA002                             |
| DS68530_pLM-AMA002_P40s-dSpCas9-eGFP-NLS-Tif35 | $\Delta$ hdfA ( $\Delta$ Ku70), $\Delta$ pen-BGC | pLM-AMA002_P40s-dSpCas9-eGFP-NLS-Tif35 |

**Table S1. List of fungal strains used in this study and created strains with their corresponding transformed donor DNA**

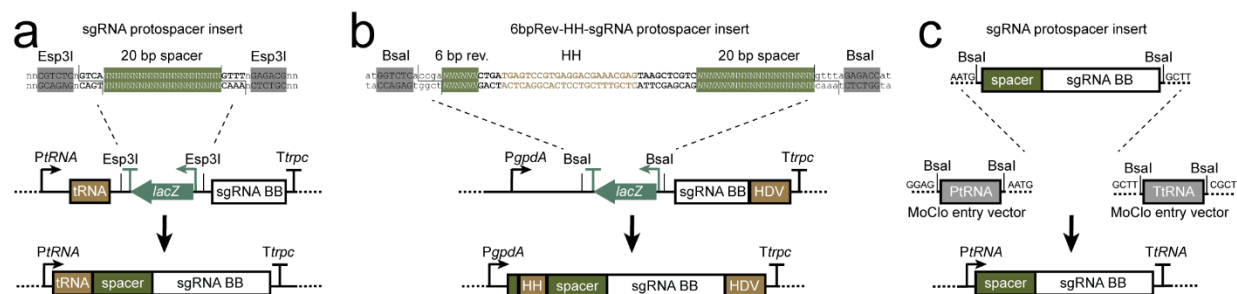

**Figure S1. Representation of different sgRNA transcription unit assembly methods.** (a) Ligation of the sgRNA target sequence carrying double-stranded-DNA into sgRNA recipient cloning site, using *Esp31* restriction sites for *PtrRNA* driven and tRNA-linked transcripts, (b) Ligation of HH-sgRNA (and 6 bp inverted repeat of the spacer sequence) using *BsaI* sites for *PgpdA* driven HH-sgRNA-HDV-based transcription (c) Ligation of sgRNA sequence using entry vectors and *BsaI* restriction-ligation-based assembly for creating functional sgRNA transcription units.

**Supplementary File S1** Elements of the Fungal Toolkit for Modular Cloning (FTK) as Genebank files
